# Supplementary material
Source: Springer Nature journal article supplement (https://www.springermedizin.de/resource/supplementary/12960_2012_343_MOESM4_ESM.pdf/9569884)
Supplement: MOESM4 [file 9569884]

Demography

Age groups, migration

## Labor supply (BIBB-Demos)

Education system

Qualification  
(ISCED 0-3a; 3b-4; 5b; 5a,6)

Choice of occupation  
(54 occupational fields)

Labor force participation

Initial vocational  
qualification

 Equube-projekt.de

## Labor demand for 54 occupational fields

Labor supply (initial vocational  
qualification) for 54 occupational fields

Occupational  
Flexibility

Potential supply of  
economically active persons  
for a current occupation  
(among them:  
'Health care professionals  
without license to  
practice medicine')

No VET

In training

Σ
